# Supplementary material for: Insulin signaling regulates a functional interaction between adenomatous polyposis coli and cytoplasmic dynein
Source: PubMed Central journal article supplement — Mol Biol Cell. 2017 Mar 1;28(5):587–99. doi: 10.1091/mbc.E16-07-0555 (PMC5328618; doi:10.1091/mbc.e16-07-0555), 2017-03-01
Supplement: supp_E16-07-0555v1_CombinedSupMats.pdf [file supp_E16-07-0555v1_CombinedSupMats.pdf]

# Supplemental Materials

*Molecular Biology of the Cell*

Gao et al.

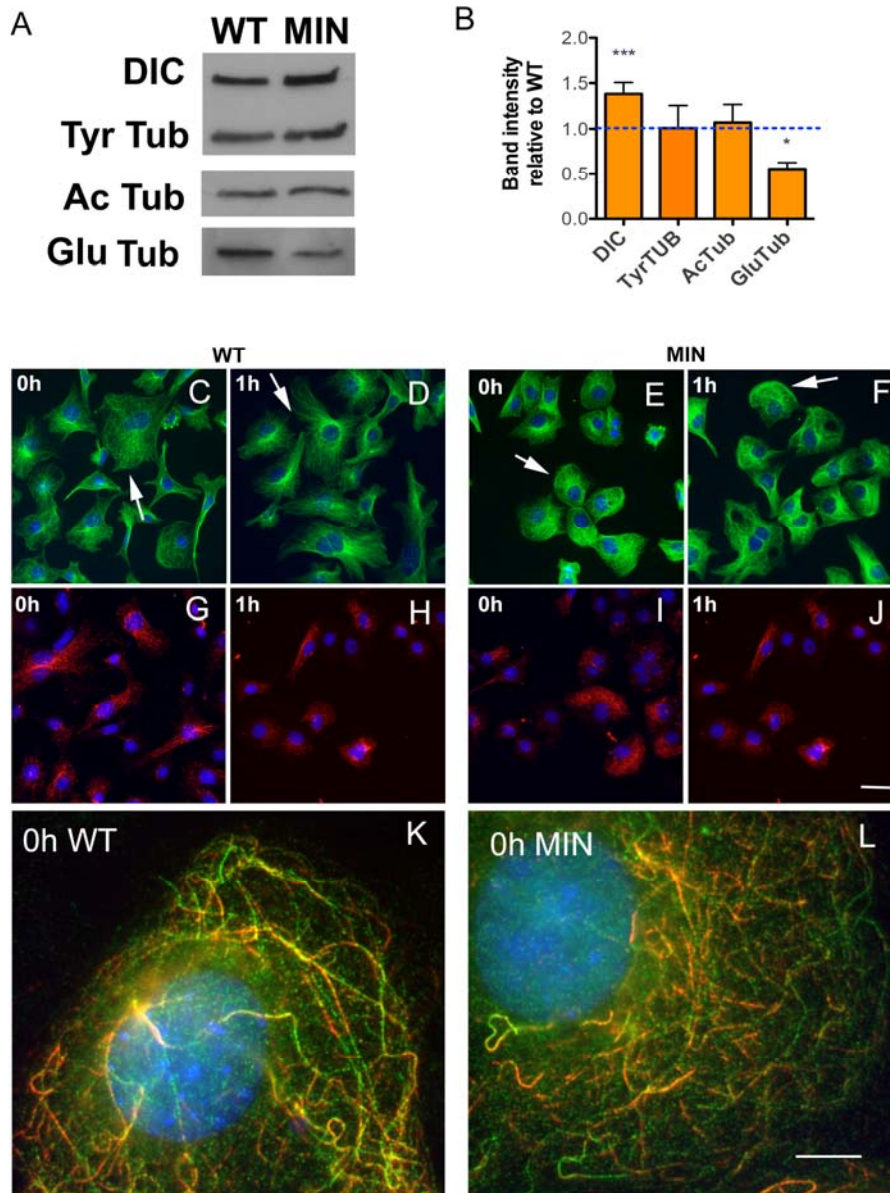

**Figure S1: A. Comparison of tubulin modifications in WT vs. MIN cells.** Western blot of extracts from WT and MIN cells probed for DIC, tyrosinated tubulin (Tyr Tub), acetylated tubulin (Ac Tub) and deetyrosinated tubulin (Glu Tub). **B.** Band intensity was measured for 3 separate experiments. The graph shows the ratio of MIN to WT levels for each antibody in A. The data are shown as the average  $\pm$  95% CI, and statistical differences determined by ANOVA of three separate experiments.  $*=p<0.05$ ,  $***=p<0.001$ . **C-F.** WT (left) and MIN cells (right) stained for tyrosinated tubulin at 0 and 1 hour after insulin. **G-J.** WT (left) and MIN cells (right) stained for acetylated tubulin at 0 and 1 hour after insulin. **K-L.** WT (left) and MIN cells (right) stained for acetylated and deetyrosinated tubulin. Scale bar for C-J = 25 $\mu$ m. Scale bar for K and L = 2.5 $\mu$ m.
